# Supplementary material for: Diversity of Flowering Responses in Wild Arabidopsis thaliana Strains
Source: PLoS Genet. 2005 Jul 25;1(1):e6. doi: 10.1371/journal.pgen.0010006 (PMC1183525; doi:10.1371/journal.pgen.0010006)
Supplement: Figure S1 — Open circles indicate known FRI/FLC defects. (47 KB PDF) [file pgen.0010006.sg001.pdf]

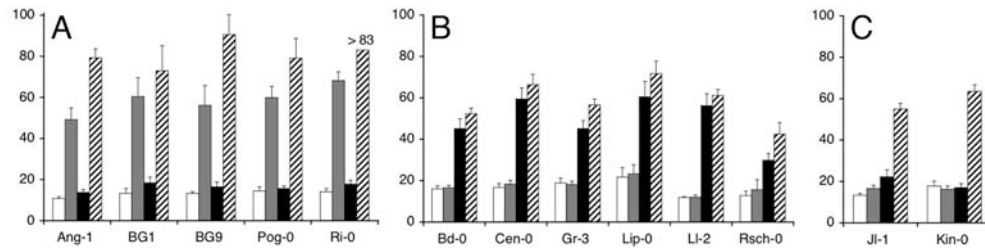

**Supplementary Figure 2.** Genetic analysis of rapid-cycling accessions.

Flowering times of F<sub>1</sub> progeny from crosses of accessions that do not carry *Ler*- or *Col*-type deletions in *FRI* to *fri-Col flc-3* (white), *FRI-Sf2 flc-3* (gray), *fri-Col FLC* (black), *FRI-Sf2 FLC* (striped). (A) F<sub>1</sub> progeny in which *FRI* causes late flowering. (B) F<sub>1</sub> progeny in which *FLC* causes late flowering. (C) F<sub>1</sub> progeny in which only simultaneous introduction of *FRI* and *FLC* causes late flowering.
