# Supplementary material for: Diversity of Flowering Responses in Wild Arabidopsis thaliana Strains
Source: PLOS journal article supplement (doi:10.1371/journal.pgen.0010006), 2005-07-25
Supplement: S5 (10.1371/journal.pgen.0010006.s005) [file journal.pgen.0010006.s005]

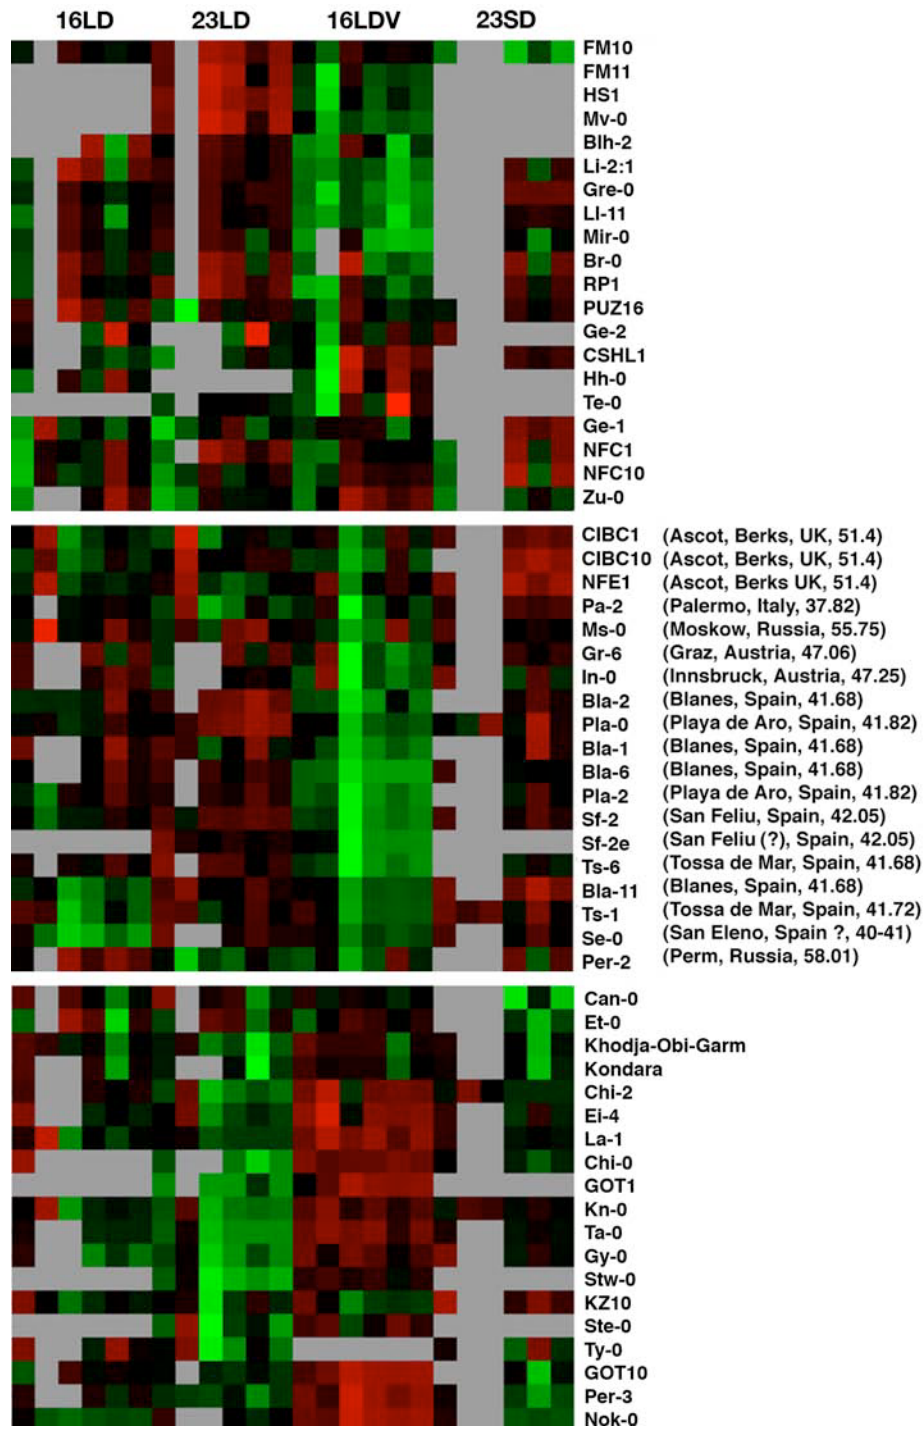

**Supplementary Figure 5.** Hierarchical clustering of accessions with functional *FRI/FLC* pathway.

Top, Accessions with moderate vernalization response. Middle, Accessions with extreme vernalization response. Several accessions in this cluster originate from lower latitudes (given in

parentheses). Bottom, Accessions that are delayed after vernalization, possibly indicating *FRI*-independent variation. Note that BG6, HR5 and Wil-1, which lack functional *FRI*, cluster with this group.
